# Supplementary material for: Th@C2(8)-C84 and Th@Cs(15)-C84: impact of actinide metal ions on the electronic structures of actinide endohedral metallofullerenes
Source: Royal Society of Chemistry journal article supplement (doi:10.1039/d3qi01215h), 2023-01-01
Supplement: d3qi01215h1.pdf [file d3qi01215h1.pdf]

## Supporting Information

**Th@C<sub>2</sub>(8)-C<sub>84</sub> and Th@C<sub>5</sub>(15)-C<sub>84</sub>: impact of actinide metal ions on the electronic structure of actinide endohedral metallofullerenes**

Tiantian Cao,<sup>‡a,b</sup> Qingyu Meng,<sup>‡b</sup> Ze Fu,<sup>‡b</sup> Yi Shen,<sup>b</sup> Yingjing Yan,<sup>b</sup> Qin Wang,<sup>b</sup> Bing Zhao,<sup>a</sup> Wenxia Wang,<sup>a</sup> Khaoula Merimi,<sup>c</sup> Antonio Rodríguez-Forteza,<sup>c</sup> Yang-Rong Yao,<sup>\*d</sup> and Ning Chen<sup>\*b</sup>

<sup>a</sup>Suzhou Institute of Trade and Commerce, 287 Xuefu Road, Suzhou, 215009, China

<sup>b</sup>College of Chemistry, Chemical Engineering and Materials Science, and State Key Laboratory of Radiation Medicine and Protection, Soochow University, Suzhou, Jiangsu 215123, P. R. China

<sup>c</sup>Departament de Química Física i Inorgànica, Universitat Rovira i Virgili, 43007 Tarragona, Spain.

<sup>d</sup>Department of Materials Science and Engineering, University of Science and Technology of China, Hefei 230026, China

<sup>‡</sup>These authors contribute equally to this work.

\*Corresponding authors.

## Table of Contents

|                                                                                                                                                                                                          |     |
|----------------------------------------------------------------------------------------------------------------------------------------------------------------------------------------------------------|-----|
| <b>HPLC isolation of two Th@C<sub>84</sub> isomers.</b> .....                                                                                                                                            | S3  |
| <b>Figure S1.</b> HPLC isolation procedures of Th@C <sub>2</sub> (8)-C <sub>84</sub> . .....                                                                                                             | S4  |
| <b>Figure S2.</b> HPLC isolation procedures of Th@C <sub>5</sub> (15)-C <sub>84</sub> . .....                                                                                                            | S5  |
| <b>Figure S3.</b> Positions of thorium in Th@C <sub>2</sub> (8)-C <sub>84</sub> and Th@C <sub>5</sub> (15)-C <sub>84</sub> . .....                                                                       | S6  |
| <b>Figure S4.</b> Optimized structures of different Th positions inside the C <sub>84</sub> isomers. ....                                                                                                | S7  |
| <b>Figure S5.</b> Molecular orbitals diagram of Th@C <sub>2</sub> (8)-C <sub>84</sub> . .....                                                                                                            | S8  |
| <b>Table S1.</b> Occupancies of disordered thorium sites in Th@C <sub>2</sub> (8)-C <sub>84</sub> and Th@C <sub>5</sub> (15)-C <sub>84</sub> . .....                                                     | S9  |
| <b>Table S2.</b> Closest Th-Cage distances (Å) in Th@C <sub>2</sub> (8)-C <sub>84</sub> and Th@C <sub>5</sub> (15)-C <sub>84</sub> from X-ray structures and from optimized structures (PBE0/TZP). ..... | S9  |
| <b>Table S3.</b> Relative energies of different Th positions in C <sub>2</sub> (8)-C <sub>84</sub> , C <sub>5</sub> (15)-C <sub>84</sub> and C <sub>5</sub> (10)-C <sub>84</sub> . ....                  | S10 |
| <b>Table S4.</b> Crystallographic information of Th@C <sub>2</sub> (8)-C <sub>84</sub> and Th@C <sub>5</sub> (15)-C <sub>84</sub> . .....                                                                | S11 |
| Coordinates (xyz) of optimized structures. ....                                                                                                                                                          | S12 |

### High-performance liquid chromatography (HPLC) isolation of two Th@C<sub>84</sub> isomers.

Th@C<sub>84</sub> was purified by multiple HPLC processes with UV detection at 310 nm using toluene as the mobile phase.

Th@C<sub>2</sub>(8)-C<sub>84</sub> was purified by a four-stage HPLC process, as shown in Figure S1. The first stage was performed on a Buckyprep-M column (25 mm × 250 mm, Cosmosil Nacalai Tesque) with a 13 mL/min flow rate. After that, the fraction from 29.2 to 33.1 min was re-injected into a Buckyprep-D column (10 mm × 250 mm, Cosmosil Nacalai Tesque) for the second stage separation with a 4 mL/min flow rate. The fraction from 32.9 to 39.2 min containing Th@C<sub>2</sub>(8)-C<sub>84</sub> was collected. The third separation stage was conducted on a Buckyprep column (10 mm × 250 mm, Cosmosil Nacalai Tesque) with a 4 mL/min flow rate. The fraction from 77.4 to 82.5 min containing Th@C<sub>2</sub>(8)-C<sub>84</sub> was collected. The final stage was performed on a Buckyprep column (10 mm × 250 mm, Cosmosil Nacalai Tesque) with a 4 mL/min flow rate under the recycle mode. After five rounds of recycling isolation, the fraction from 371.2 to 382.8 min containing pure Th@C<sub>2</sub>(8)-C<sub>84</sub> was collected and stored for further characterization.

Th@C<sub>5</sub>(15)-C<sub>84</sub> was purified by a four-stage HPLC process, as shown in Figure S2. The first stage was performed on a Buckyprep-M column (25 mm × 250 mm, Cosmosil Nacalai Tesque) with a 13 mL/min flow rate. The fraction from 29.2 to 33.2 min was re-injected into a Buckyprep column (10 mm × 250 mm, Cosmosil Nacalai Tesque) for the second stage separation with a 4 mL/min flow rate. The fraction from 82.9 to 94.6 min containing Th@C<sub>5</sub>(15)-C<sub>84</sub> was collected. The third separation stage was conducted on a 5PBB column (10 mm × 250 mm, Cosmosil Nacalai Tesque) with a 4 mL/min flow rate. The fraction from 106.4 to 116.3 min containing Th@C<sub>5</sub>(15)-C<sub>84</sub> was collected. The final stage was performed on a Buckyprep column (10 mm × 250 mm, Cosmosil Nacalai Tesque) with a 4 mL/min flow rate under the recycle mode. After three rounds of recycling isolation, the fraction from 243.5 to 253.6 min containing pure Th@C<sub>5</sub>(15)-C<sub>84</sub> was collected and stored for further characterization.

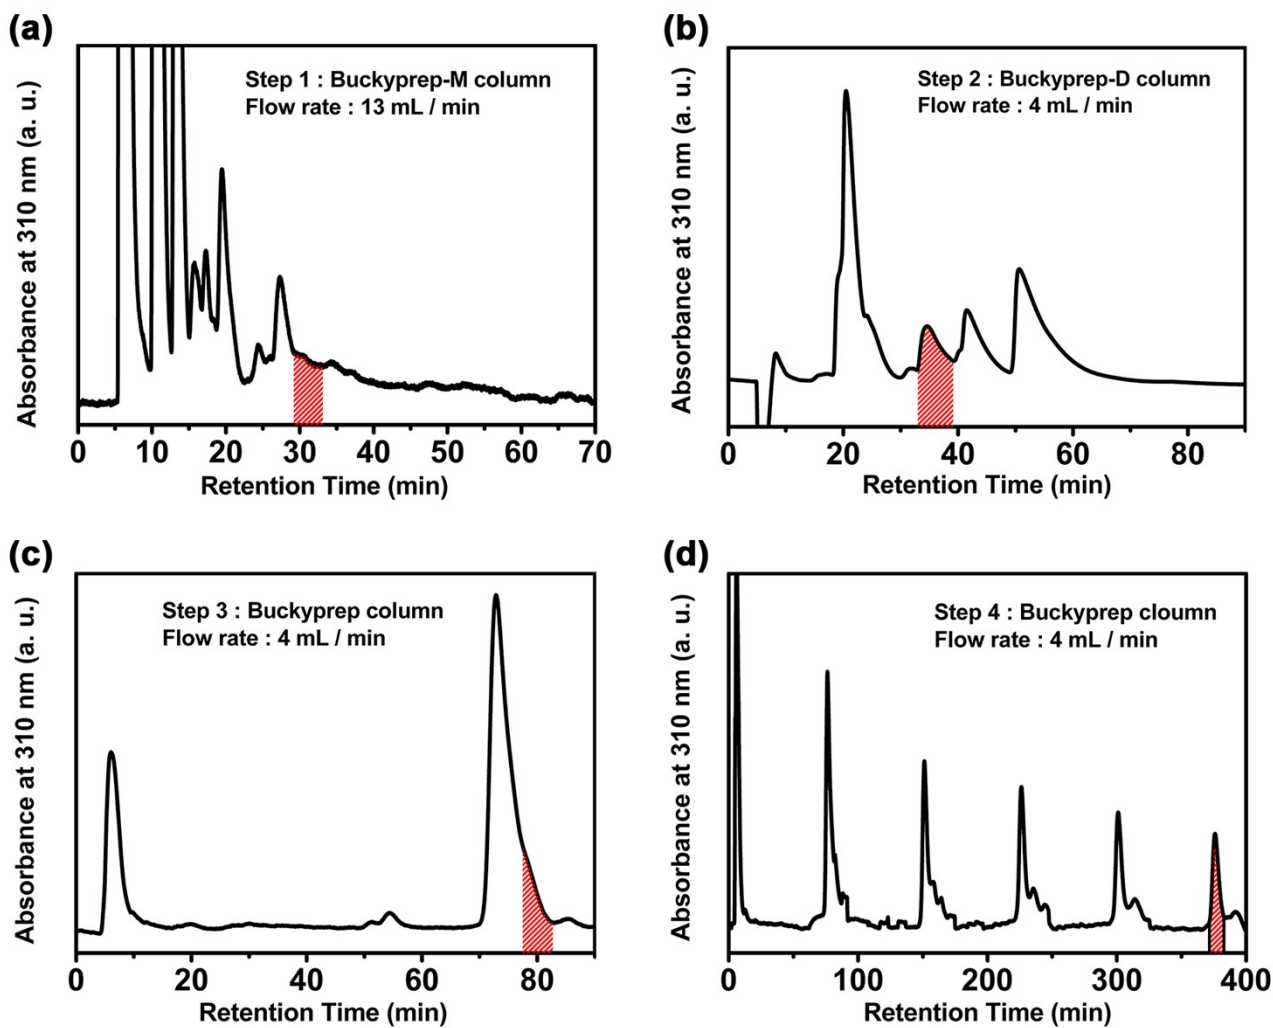

Fig. S1 HPLC isolation procedures of Th@C<sub>2</sub>(8)-C<sub>84</sub>.

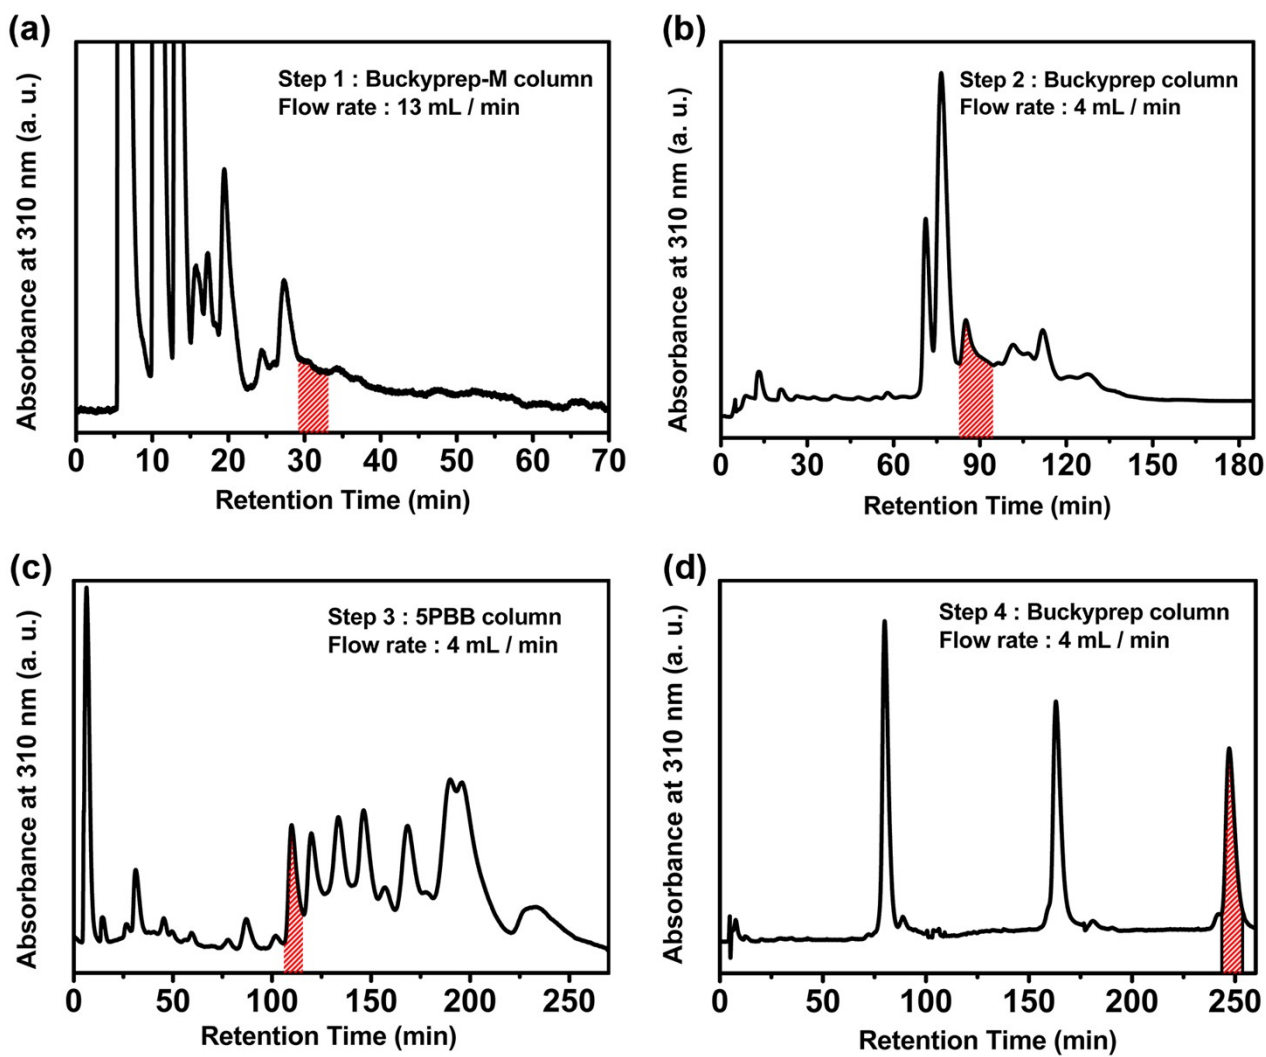

Fig. S2 HPLC isolation procedures of Th@C<sub>5</sub>(15)-C<sub>84</sub>.

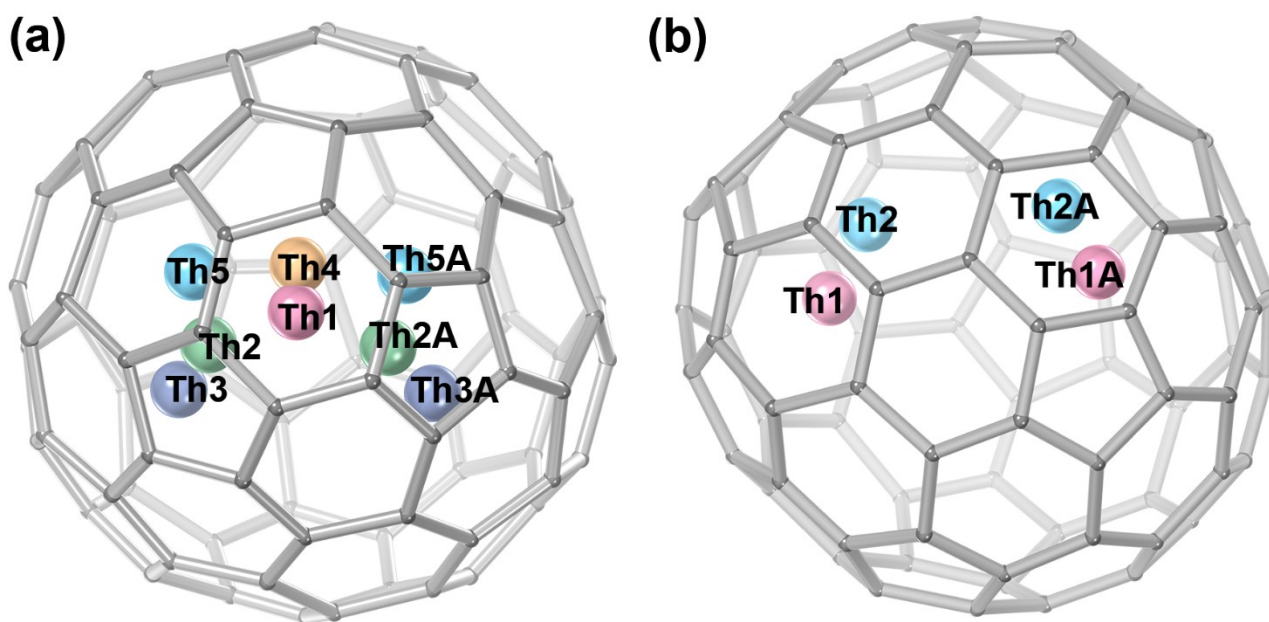

**Fig. S3** Ball and stick representation of disordered Th sites inside (a)  $\text{Th}@C_2(8)\text{-C}_{84}$  and (b)  $\text{Th}@C_5(15)\text{-C}_{84}$ , respectively. For clarity, only the major cage orientations are shown for all EMFs. For  $\text{Th}@C_2(8)\text{-C}_{84}$ , three positions (Th2, Th3, and Th5) and the mirror-related site (Th2A, Th3A, and Th5A) are observed. For  $\text{Th}@C_5(15)\text{-C}_{84}$ , two positions (Th1 and Th2) and the mirror-related site (Th1A and Th2A) are observed.

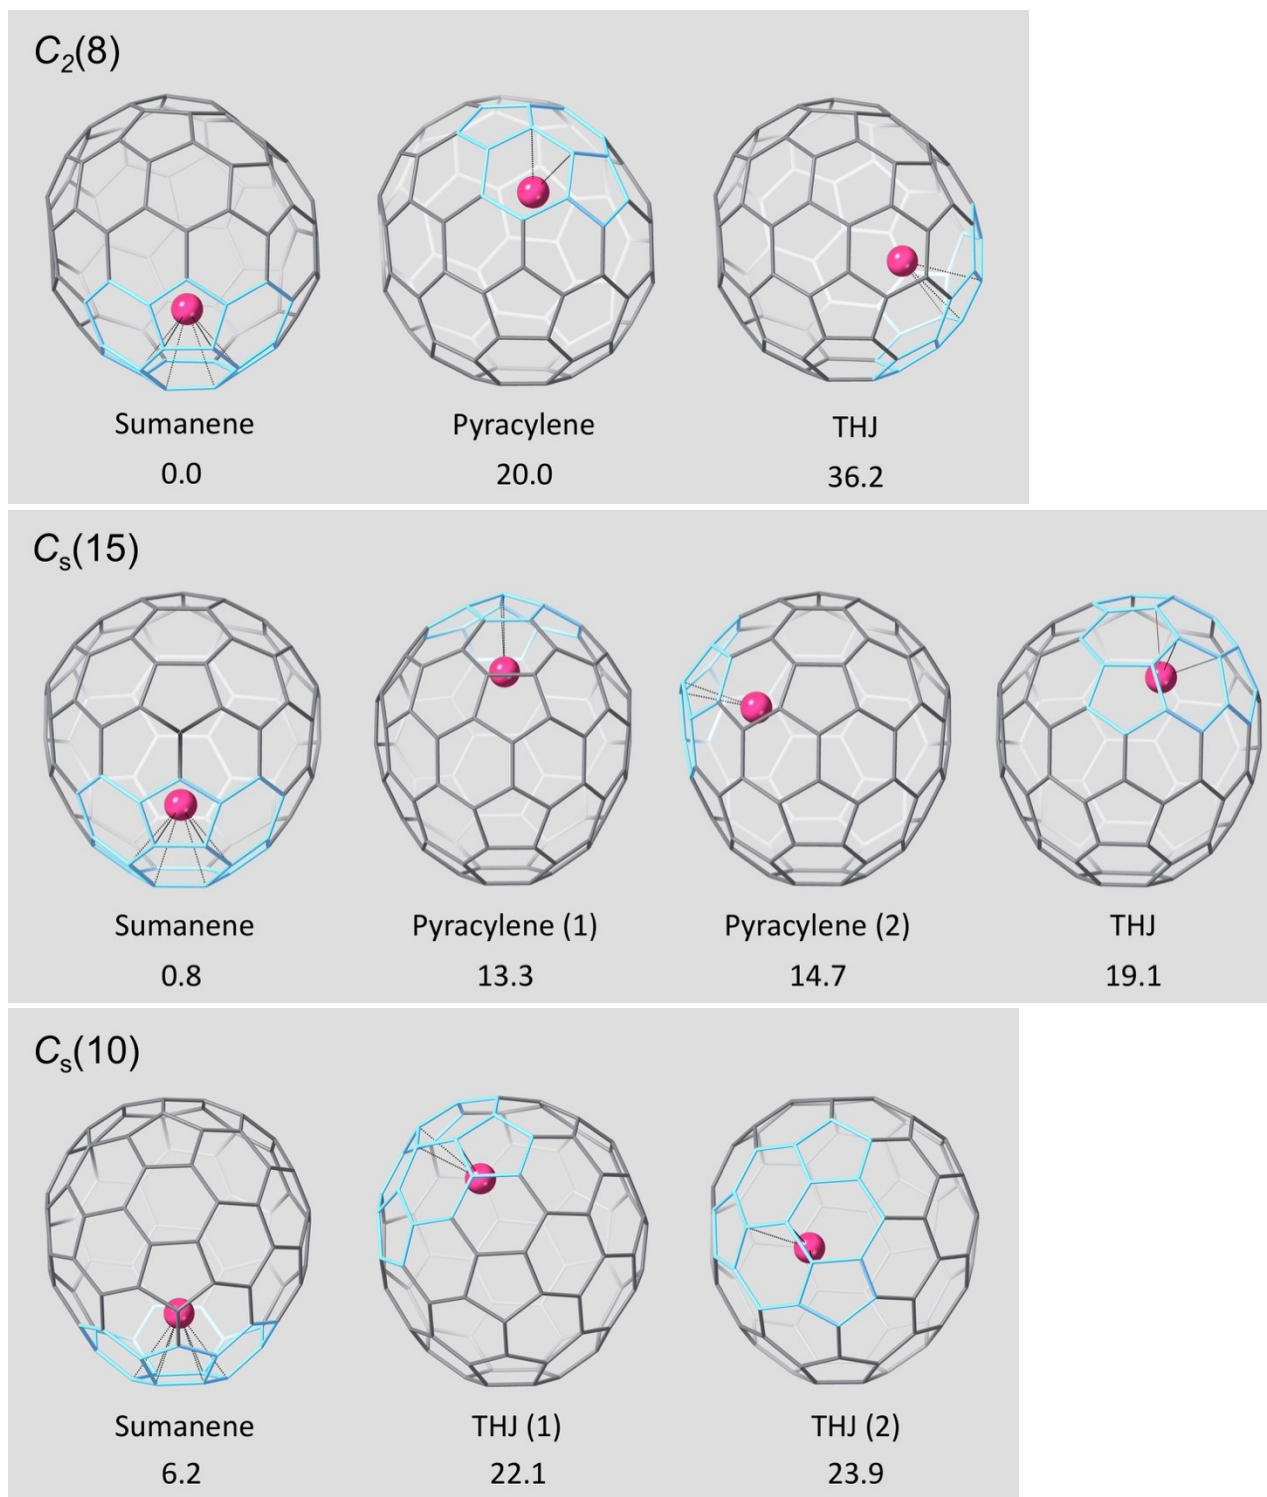

**Figure S4.** Optimized structures at PBE0/TZP level for different Th positions in Th@ $C_2(8)$ - $C_{84}$ , Th@ $C_s(15)$ - $C_{84}$  and Th@ $C_s(10)$ - $C_{84}$ . Relative energies (in kcal·mol<sup>-1</sup>) are indicated (see also Table S4).

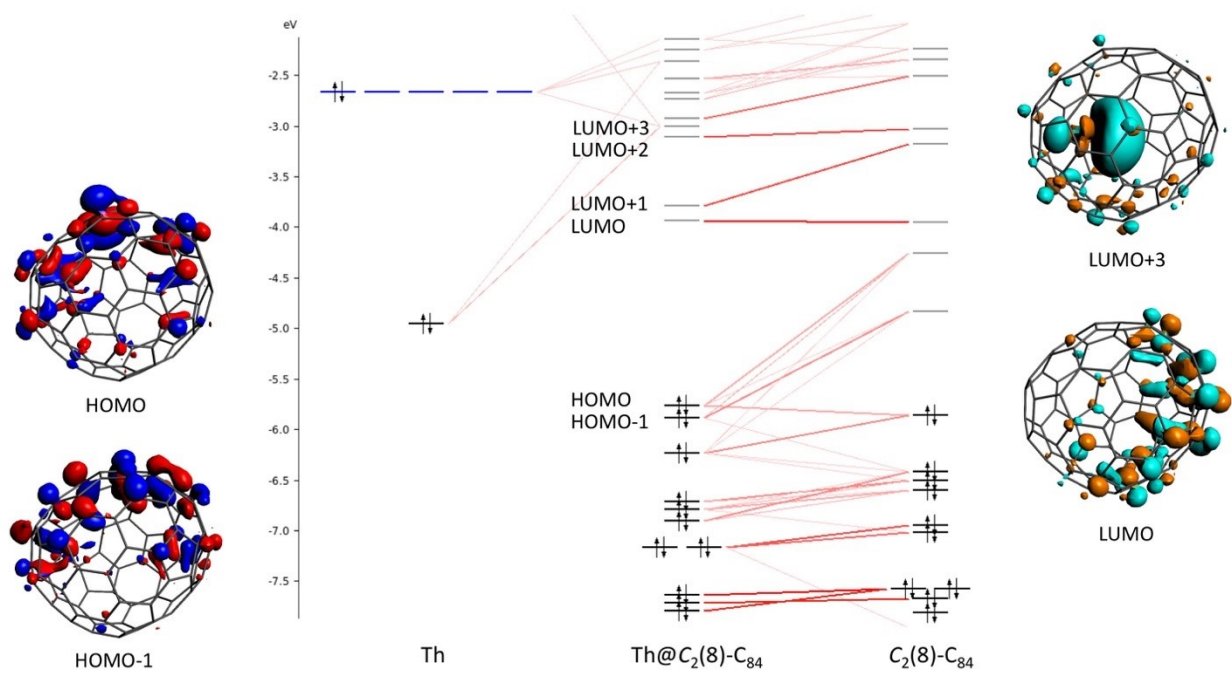

**Fig. S5** Molecular orbitals (MO) diagram and MO isosurfaces for some frontier MO of Th@C<sub>2</sub>(8)-C<sub>84</sub>. The occupied MO shows a rather small contribution from Th orbitals, with 7s, 6d, and 5f Th orbitals essentially empty. Therefore, we can consider Th(IV) formally.



**Table S1.** Occupancies of disordered thorium sites in Th@C<sub>2</sub>(8)-C<sub>84</sub> and Th@C<sub>5</sub>(15)-C<sub>84</sub>.

| Compounds                              | Fractional occupancy of atom position |            |            |          |           |
|----------------------------------------|---------------------------------------|------------|------------|----------|-----------|
|                                        | Th1                                   | Th2/Th2A   | Th3/Th3A   | Th4      | Th5/Th5A  |
| Th@C <sub>2</sub> (8)-C <sub>84</sub>  | 0.730(3)                              | 0.0616(10) | 0.0454(11) | 0.037(3) | 0.0090(7) |
| Th@C <sub>5</sub> (15)-C <sub>84</sub> | Th1/Th1A                              |            | Th2/Th2A   |          |           |
|                                        | 0.3159(10)                            |            | 0.1841(10) |          |           |

**Table S2.** Closest Th-Cage distances (Å) in Th@C<sub>2</sub>(8)-C<sub>84</sub> and Th@C<sub>5</sub>(15)-C<sub>84</sub> from X-ray structures and from optimized structures (PBE0/TZP).

| Th@C <sub>2</sub> (8)-C <sub>84</sub> |                  |                | Th@C <sub>5</sub> (15)-C <sub>84</sub> |                  |                |
|---------------------------------------|------------------|----------------|----------------------------------------|------------------|----------------|
| Label                                 | X-ray structures | DFT structures | Label                                  | X-ray structures | DFT structures |
| Th1-C1                                | 2.465(17) Å      | 2.460          | Th1-C1                                 | 2.313(15) Å      | 2.462          |
| Th1-C2                                | 2.374(16) Å      | 2.472          | Th1-C2                                 | 2.275(17) Å      | 2.462          |
| Th1-C3                                | 2.357(16) Å      | 2.475          | Th1-C3                                 | 2.270(18) Å      | 2.474          |
| Th1-C4                                | 2.393(14) Å      | 2.480          | Th1-C4                                 | 2.417(15) Å      | 2.474          |
| Th1-C5                                | 2.530(15) Å      | 2.517          | Th1-C5                                 | 2.424(15) Å      | 2.534          |
| Th1-C6                                | 2.502(15) Å      | 2.525          | Th1-C6                                 | 2.312(15) Å      | 2.534          |

**Table S3.** Relative energies at PBE0/TZP level for different Th positions in Th@C<sub>2</sub>(8)-C<sub>84</sub>, Th@C<sub>s</sub>(15)-C<sub>84</sub> and Th@C<sub>s</sub>(10)-C<sub>84</sub>.<sup>a</sup> See also Figure S4.

| IPR isomer          | Th position   | Relative energy |
|---------------------|---------------|-----------------|
| C <sub>2</sub> (8)  | Sumanene      | 0.0             |
|                     | Pyrcylene     | 20.0            |
|                     | THJ           | 36.2            |
| C <sub>s</sub> (15) | Sumanene      | 0.8             |
|                     | Pyrcylene (1) | 13.3            |
|                     | Pyrcylene (2) | 14.7            |
|                     | THJ           | 19.1            |
| C <sub>s</sub> (10) | Sumanene      | 6.2             |
|                     | THJ (1)       | 22.1            |
|                     | THJ (2)       | 23.9            |

<sup>a</sup> Relative energies in kcal·mol<sup>-1</sup>. THJ stands for Triple Hexagon Junction

**Table S4.** Crystallographic information of Th@C<sub>2</sub>(8)-C<sub>84</sub> and Th@C<sub>5</sub>(15)-C<sub>84</sub>.

|                                                | Th@C <sub>2</sub> (8)-C <sub>84</sub>                 | Th@C <sub>5</sub> (15)-C <sub>84</sub>                |
|------------------------------------------------|-------------------------------------------------------|-------------------------------------------------------|
| Formula                                        | C <sub>128</sub> H <sub>51</sub> N <sub>4</sub> Ni Th | C <sub>126</sub> H <sub>50</sub> N <sub>4</sub> Ni Th |
| Formula weight                                 | 1935.47                                               | 1910.45                                               |
| Crystal size, mm <sup>3</sup>                  | 0.1×0.08×0.06                                         | 0.14×0.1×0.06                                         |
| Crystal system                                 | Monoclinic                                            | Monoclinic                                            |
| Space group                                    | C2/m (No. 12)                                         | C2/m (No. 12)                                         |
| a, Å                                           | 27.462(2)                                             | 25.3891(17)                                           |
| b, Å                                           | 16.9912(14)                                           | 15.1408(11)                                           |
| c, Å                                           | 17.7357(14)                                           | 19.9283(14)                                           |
| α, deg                                         | 90                                                    | 90                                                    |
| β, deg                                         | 107.907(4)                                            | 94.647(4)                                             |
| γ, deg                                         | 90                                                    | 90                                                    |
| Volume, Å <sup>3</sup>                         | 7874.7(11)                                            | 7635.5(9)                                             |
| Z                                              | 4                                                     | 4                                                     |
| ρ, g cm <sup>-3</sup>                          | 1.633                                                 | 1.662                                                 |
| F(000)                                         | 3860                                                  | 3808                                                  |
| θ, deg                                         | 2.699 to 54.097                                       | 1.935 to 53.946                                       |
| T, K                                           | 122(2)                                                | 120(2)                                                |
| Radiation (λ, mm <sup>-1</sup> )               | 1.34139                                               | 1.34139                                               |
| R <sub>1</sub> / wR <sub>2</sub> (all data)    | 0.1069 / 0.2168                                       | 0.1237 / 0.2660                                       |
| R <sub>1</sub> / wR <sub>2</sub> (I > 2.0σ(I)) | 0.0719 / 0.1922                                       | 0.0921 / 0.2444                                       |
| obs reflects                                   | 4838                                                  | 5073                                                  |
| total reflects                                 | 7520                                                  | 7270                                                  |
| R <sub>int</sub>                               | 0.0841                                                | 0.0799                                                |
| Goodness-of-fit indicator                      | 1.029                                                 | 1.057                                                 |
| Parameters                                     | 1031                                                  | 999                                                   |
| density, e Å <sup>-3</sup>                     | -0.772 / 0.793                                        | -1.804 / 1.198                                        |

Optimized xyz coordinates for the structures in Figure S4:

| Th@C <sub>2</sub> (8)-C <sub>84</sub> Sumanene |           |           |           |   |           |           |           |
|------------------------------------------------|-----------|-----------|-----------|---|-----------|-----------|-----------|
| C                                              |           |           |           | C | -0.859133 | 0.958075  | 3.736907  |
| C                                              |           |           |           | C | -1.199044 | 2.167877  | 2.981073  |
| C                                              | -4.438473 | -1.388787 | -0.121009 | C | -0.148574 | 3.061210  | 2.655731  |
| C                                              | -4.385909 | -0.632199 | -1.352041 | C | -0.149181 | 3.817278  | 1.446683  |
| C                                              | -3.460520 | -1.303216 | -2.241925 | C | -1.232803 | 3.764352  | 0.547209  |
| C                                              | -3.046868 | -2.518217 | -1.607444 | C | -0.929759 | 3.944060  | -0.844302 |
| C                                              | -3.567001 | -2.530621 | -0.273697 | C | 0.416461  | 3.931731  | -1.322135 |
| C                                              | -4.406067 | -0.694004 | 1.171967  | C | 0.457605  | 3.172726  | -2.547913 |
| C                                              | -4.307832 | 0.753965  | 1.213631  | C | 1.595707  | 2.401932  | -2.897646 |
| C                                              | -4.301429 | 1.517392  | -0.015732 | C | 1.374251  | 1.129162  | -3.585091 |
| C                                              | -4.326410 | 0.822351  | -1.315856 | C | 2.414295  | 0.167236  | -3.505420 |
| C                                              | -3.341984 | 1.469578  | -2.162610 | C | 2.119254  | -1.236497 | -3.475835 |
| C                                              | -2.413348 | 0.802788  | -3.073617 | C | 2.917250  | -1.870769 | -2.441694 |
| C                                              | -2.536686 | -0.637140 | -3.152554 | C | 2.337531  | -2.814707 | -1.557525 |
| C                                              | -1.432102 | -1.376783 | -3.600958 | C | 2.736474  | -2.774567 | -0.145032 |
| C                                              | -1.087025 | -2.668838 | -3.021647 | C | 1.833457  | -3.276113 | 0.892310  |
| C                                              | -1.848698 | -3.211317 | -1.967754 | C | 1.837549  | -2.686737 | 2.231547  |
| C                                              | -1.175318 | -3.929574 | -0.955727 | C | 0.660732  | -2.786871 | 3.015836  |
| C                                              | -1.668925 | -3.904730 | 0.409033  | C | 0.240092  | -1.694700 | 3.871252  |
| C                                              | -2.797227 | -3.150724 | 0.785021  | C | 1.043839  | -0.598150 | 4.059888  |
| C                                              | -2.787804 | -2.466342 | 2.080624  | C | 0.492099  | 0.733594  | 4.086392  |
| C                                              | -3.505106 | -1.212373 | 2.166175  | C | 1.541700  | 1.603393  | 3.639458  |
| C                                              | -2.909087 | -0.103525 | 2.857191  | C | 1.229822  | 2.759072  | 2.960637  |
| C                                              | -3.318686 | 1.100846  | 2.215629  | C | 2.071802  | 3.238354  | 1.898081  |
| C                                              | -2.384732 | 2.216223  | 2.143984  | C | 1.223929  | 3.912097  | 0.973989  |
| C                                              | -2.408789 | 3.002300  | 0.945283  | C | 1.511354  | 3.913192  | -0.416560 |
| C                                              | -3.337333 | 2.583323  | -0.105853 | C | 2.706029  | 3.280605  | -0.840333 |
| C                                              | -2.885573 | 2.627715  | -1.464277 | C | 2.766239  | 2.589200  | -2.113677 |
| C                                              | -1.711337 | 3.272900  | -1.823674 | C | 3.737209  | 1.550173  | -1.981547 |
| C                                              | -0.865887 | 2.728630  | -2.836144 | C | 3.574324  | 0.360077  | -2.667569 |
| C                                              | -1.145026 | 1.442483  | -3.388317 | C | 3.862096  | -0.894358 | -2.003681 |
| C                                              | 0.000784  | 0.653665  | -3.819176 | C | 4.282288  | -0.898075 | -0.677810 |
| C                                              | -0.208577 | -0.734635 | -3.981317 | C | 3.712474  | -1.834559 | 0.242532  |
| C                                              | 0.850230  | -1.675188 | -3.740997 | C | 3.670610  | -1.191596 | 1.546471  |
| C                                              | 0.326808  | -2.813415 | -3.042220 | C | 2.736191  | -1.575647 | 2.524790  |
| C                                              | 1.034481  | -3.361132 | -1.925931 | C | 2.345044  | -0.556964 | 3.443092  |
| C                                              | 0.252865  | -3.965681 | -0.919168 | C | 2.681883  | 0.813537  | 3.226902  |
| C                                              | 0.668739  | -3.950168 | 0.468186  | C | 3.502337  | 1.221858  | 2.141335  |
| C                                              | -0.519890 | -3.987817 | 1.266033  | C | 3.208475  | 2.488648  | 1.463869  |
| C                                              | -0.530738 | -3.383831 | 2.512330  | C | 3.570302  | 2.621211  | 0.096724  |
| C                                              | -1.677616 | -2.609084 | 2.924630  | C | 4.222462  | 1.548371  | -0.610882 |
| C                                              | -1.175689 | -1.516151 | 3.739047  | C | 4.491317  | 0.347091  | 0.020875  |
| C                                              | -1.708552 | -0.217219 | 3.618476  | C | 4.098378  | 0.165405  | 1.397896  |

|                                                  |           |           |           |    |           |           |           |
|--------------------------------------------------|-----------|-----------|-----------|----|-----------|-----------|-----------|
| Th                                               | -2.345222 | 0.008294  | -0.106839 | C  | -1.921722 | 2.153689  | 3.007903  |
|                                                  |           |           |           | C  | -2.929989 | 1.167344  | 2.854339  |
|                                                  |           |           |           | C  | -0.490004 | 3.773505  | 1.779786  |
| Th@C <sub>2</sub> (8)-C <sub>84</sub> Pyracylene |           |           |           | C  | -0.757783 | 1.579830  | 3.612775  |
| C                                                | -1.641210 | -3.265086 | 1.892972  | C  | 0.551246  | 1.990244  | 3.216584  |
| C                                                | -2.464300 | -3.210601 | 0.748178  | C  | 0.717944  | 3.147153  | 2.340053  |
| C                                                | -3.592276 | -2.332992 | 0.813523  | C  | 2.968730  | 2.337282  | 1.751932  |
| C                                                | -4.150085 | -1.757812 | -0.379794 | C  | 1.936751  | 3.265668  | 1.544371  |
| C                                                | -3.613713 | -2.094728 | -1.607684 | C  | 1.827106  | 3.819876  | 0.189468  |
| C                                                | -0.420146 | -3.830984 | -0.613768 | C  | -2.418095 | -0.034320 | 3.447100  |
| C                                                | -1.857902 | -3.534364 | -0.538948 | C  | -2.772259 | -1.307344 | 2.914017  |
| C                                                | -2.504284 | -3.018809 | -1.696515 | C  | -3.705584 | -1.351216 | 1.848218  |
| C                                                | 0.242525  | -3.611904 | -1.839009 | C  | -1.798157 | -2.332744 | 2.970266  |
| C                                                | -0.417476 | -2.961400 | -2.933015 | C  | -1.083526 | 0.221843  | 3.914373  |
| C                                                | -1.752169 | -2.645440 | -2.854141 | C  | -0.088911 | -0.789805 | 3.916628  |
| C                                                | 0.414568  | -3.835990 | 0.585574  | C  | -0.501884 | -2.094150 | 3.555031  |
| C                                                | 1.852754  | -3.540912 | 0.512931  | C  | 1.748308  | -2.668918 | 2.834610  |
| C                                                | -0.247791 | -3.624976 | 1.812400  | C  | 0.413154  | -2.983502 | 2.911158  |
| C                                                | 2.499877  | -3.034823 | 1.674258  | C  | 2.847501  | 1.272777  | 2.718441  |
| C                                                | -4.356394 | 0.596253  | -1.067753 | C  | 1.622289  | 1.003766  | 3.367349  |
| C                                                | -3.754906 | 0.248405  | -2.333038 | C  | 1.305247  | -0.387350 | 3.716985  |
| C                                                | -4.548035 | -0.394263 | -0.098022 | C  | 2.220820  | -1.391633 | 3.326987  |
| C                                                | -3.422803 | -1.068345 | -2.612498 | C  | 4.357238  | 0.582037  | 1.072110  |
| C                                                | -2.222818 | -1.363883 | -3.337084 | C  | 3.755230  | 0.225779  | 2.334802  |
| C                                                | -2.845684 | 1.296901  | -2.709007 | C  | 3.421215  | -1.092513 | 2.604561  |
| C                                                | -1.620854 | 1.030891  | -3.359877 | C  | 4.547470  | -0.401584 | 0.095096  |
| C                                                | -1.305814 | -0.358088 | -3.719742 | C  | 2.570410  | 3.164995  | -0.856455 |
| C                                                | 1.083854  | 0.249063  | -3.912645 | C  | 3.583545  | 2.160849  | -0.651803 |
| C                                                | 0.087756  | -0.761109 | -3.922365 | C  | 3.867428  | 1.867010  | 0.695692  |
| C                                                | 0.498845  | -2.068657 | -3.570335 | C  | 2.931665  | 1.184027  | -2.845657 |
| C                                                | -2.565820 | 3.162265  | 0.879741  | C  | 1.924834  | 2.172951  | -2.991966 |
| C                                                | -3.580431 | 2.161191  | 0.667711  | C  | 1.760743  | 3.168120  | -2.024323 |
| C                                                | -3.864722 | 1.877729  | -0.681919 | C  | 4.251803  | -0.128194 | -1.276489 |
| C                                                | -2.965437 | 2.354480  | -1.734734 | C  | 3.773782  | 1.144144  | -1.680921 |
| C                                                | -1.932019 | 3.279686  | -1.520290 | C  | 1.794780  | -2.313454 | -2.987359 |
| C                                                | -1.821488 | 3.823567  | -0.161347 | C  | 3.703626  | -1.342953 | -1.858128 |
| C                                                | 0.597385  | 4.332247  | -0.396090 | C  | 2.770369  | -1.289908 | -2.923573 |
| C                                                | -0.591065 | 4.329899  | 0.427931  | C  | 2.418035  | -0.012477 | -3.447248 |
| C                                                | 0.760075  | 1.605241  | -3.601049 | C  | 3.610644  | -2.111732 | 1.592209  |
| C                                                | -0.548376 | 2.014683  | -3.201875 | C  | 4.147540  | -1.766586 | 0.366830  |
| C                                                | -0.713376 | 3.165341  | -2.316858 | C  | 3.588889  | -2.332151 | -0.830688 |
| C                                                | 0.495478  | 3.785879  | -1.752004 | C  | 2.459627  | -3.208564 | -0.771776 |
| C                                                | -3.772140 | 1.137216  | 1.689322  | C  | 1.636470  | -3.253444 | -1.916937 |
| C                                                | -4.252013 | -0.131408 | 1.275556  | Th | 0.002083  | 2.031604  | 0.007367  |
| C                                                | -1.756181 | 3.155682  | 2.047596  |    |           |           |           |

|                                           |           |           |           |    |           |           |           |
|-------------------------------------------|-----------|-----------|-----------|----|-----------|-----------|-----------|
|                                           |           |           |           | C  | -1.228868 | 2.163236  | 2.982727  |
| Th@C <sub>2</sub> (8)-C <sub>84</sub> THJ |           |           |           | C  | -0.172145 | 3.043487  | 2.644410  |
| C                                         | -4.364019 | -1.345831 | -0.081676 | C  | -0.169221 | 3.811795  | 1.439503  |
| C                                         | -4.297950 | -0.584281 | -1.313202 | C  | -1.259800 | 3.773741  | 0.545843  |
| C                                         | -3.493533 | -1.304088 | -2.242560 | C  | -0.950966 | 3.955955  | -0.839422 |
| C                                         | -3.093988 | -2.573139 | -1.624451 | C  | 0.398740  | 3.933658  | -1.314392 |
| C                                         | -3.621880 | -2.559424 | -0.263153 | C  | 0.440496  | 3.176208  | -2.541164 |
| C                                         | -4.323649 | -0.678151 | 1.140174  | C  | 1.576122  | 2.407611  | -2.886619 |
| C                                         | -4.215602 | 0.766814  | 1.177943  | C  | 1.351237  | 1.127228  | -3.544516 |
| C                                         | -4.200636 | 1.496838  | -0.001859 | C  | 2.407393  | 0.157205  | -3.488695 |
| C                                         | -4.229244 | 0.804597  | -1.278513 | C  | 2.123597  | -1.239908 | -3.444670 |
| C                                         | -3.343995 | 1.505975  | -2.166945 | C  | 2.963902  | -1.891860 | -2.465571 |
| C                                         | -2.439885 | 0.816237  | -3.021746 | C  | 2.341439  | -2.844944 | -1.586680 |
| C                                         | -2.568006 | -0.632938 | -3.074933 | C  | 2.753564  | -2.767749 | -0.157653 |
| C                                         | -1.437591 | -1.407356 | -3.520769 | C  | 1.829341  | -3.231516 | 0.873076  |
| C                                         | -1.138737 | -2.783419 | -3.102174 | C  | 1.827970  | -2.673607 | 2.209957  |
| C                                         | -1.969815 | -3.324874 | -2.035483 | C  | 0.644388  | -2.777318 | 3.007546  |
| C                                         | -1.218278 | -3.996536 | -0.986137 | C  | 0.218895  | -1.691791 | 3.865610  |
| C                                         | -1.673233 | -3.830546 | 0.372286  | C  | 1.015955  | -0.594410 | 4.037333  |
| C                                         | -2.850063 | -3.099174 | 0.783934  | C  | 0.467770  | 0.735679  | 4.084859  |
| C                                         | -2.827935 | -2.428762 | 2.082971  | C  | 1.510145  | 1.592533  | 3.638466  |
| C                                         | -3.538716 | -1.203915 | 2.218469  | C  | 1.207110  | 2.745465  | 2.954414  |
| C                                         | -2.971473 | -0.088357 | 2.932233  | C  | 2.054025  | 3.229495  | 1.899386  |
| C                                         | -3.340294 | 1.129255  | 2.250635  | C  | 1.197669  | 3.900227  | 0.973948  |
| C                                         | -2.429124 | 2.214320  | 2.148637  | C  | 1.496311  | 3.910459  | -0.417680 |
| C                                         | -2.447748 | 3.020747  | 0.932942  | C  | 2.696599  | 3.289766  | -0.841096 |
| C                                         | -3.344312 | 2.636253  | -0.111579 | C  | 2.758006  | 2.593168  | -2.104419 |
| C                                         | -2.932943 | 2.708175  | -1.489559 | C  | 3.729665  | 1.556867  | -1.976980 |
| C                                         | -1.749974 | 3.317800  | -1.834156 | C  | 3.568837  | 0.353701  | -2.667025 |
| C                                         | -0.892948 | 2.749259  | -2.839997 | C  | 3.881049  | -0.898710 | -2.017427 |
| C                                         | -1.155647 | 1.461717  | -3.352965 | C  | 4.318414  | -0.891265 | -0.685345 |
| C                                         | -0.010105 | 0.664062  | -3.730187 | C  | 3.730527  | -1.832399 | 0.228354  |
| C                                         | -0.221671 | -0.752237 | -3.841461 | C  | 3.670513  | -1.195030 | 1.534820  |
| C                                         | 0.833432  | -1.698479 | -3.666154 | C  | 2.732258  | -1.575421 | 2.509841  |
| C                                         | 0.322781  | -2.935953 | -3.122001 | C  | 2.336231  | -0.560245 | 3.430294  |
| C                                         | 1.104628  | -3.508155 | -2.001608 | C  | 2.664620  | 0.798934  | 3.213967  |
| C                                         | 0.250842  | -4.059445 | -0.962504 | C  | 3.486075  | 1.210837  | 2.131026  |
| C                                         | 0.644658  | -3.895246 | 0.422113  | C  | 3.187650  | 2.485353  | 1.456727  |
| C                                         | -0.535425 | -3.886505 | 1.220007  | C  | 3.563730  | 2.623204  | 0.095333  |
| C                                         | -0.544767 | -3.341787 | 2.500563  | C  | 4.220681  | 1.558626  | -0.617339 |
| C                                         | -1.695617 | -2.581134 | 2.930756  | C  | 4.498902  | 0.343551  | 0.007740  |
| C                                         | -1.208305 | -1.515010 | 3.741035  | C  | 4.090281  | 0.163104  | 1.386555  |
| C                                         | -1.762760 | -0.200423 | 3.652138  | Th | -0.284674 | -1.638866 | -1.124082 |
| C                                         | -0.900053 | 0.966291  | 3.745090  |    |           |           |           |

| Th@C <sub>s</sub> (15)-C <sub>84</sub> Sumanene |           |           |           | C  | -1.230093 | 1.627639  | 3.475438  |
|-------------------------------------------------|-----------|-----------|-----------|----|-----------|-----------|-----------|
| C                                               | -4.279714 | -1.461403 | -0.204436 | C  | -0.128183 | 2.477297  | 3.255103  |
| C                                               | -4.356967 | -0.502760 | -1.284705 | C  | -0.113139 | 3.409146  | 2.182012  |
| C                                               | -3.463920 | -0.952075 | -2.320051 | C  | -1.164952 | 3.483873  | 1.233611  |
| C                                               | -2.870996 | -2.190457 | -1.901436 | C  | -0.818516 | 3.864330  | -0.138861 |
| C                                               | -3.290912 | -2.461503 | -0.566580 | C  | 0.538566  | 4.111570  | -0.454831 |
| C                                               | -4.282308 | -0.996335 | 1.168606  | C  | 1.082775  | 3.714375  | -1.724792 |
| C                                               | -4.285418 | 0.447773  | 1.459557  | C  | 0.267981  | 3.255696  | -2.730564 |
| C                                               | -4.286187 | 1.408308  | 0.373568  | C  | 0.676731  | 2.146988  | -3.569106 |
| C                                               | -4.360335 | 0.942532  | -0.993489 | C  | 1.857703  | 1.413653  | -3.294903 |
| C                                               | -3.469948 | 1.761567  | -1.773292 | C  | 1.860760  | -0.018916 | -3.583333 |
| C                                               | -2.762032 | 1.336543  | -2.957277 | C  | 2.762826  | -0.906791 | -2.844219 |
| C                                               | -2.758797 | -0.098762 | -3.246512 | C  | 2.389567  | -2.263081 | -2.602480 |
| C                                               | -1.655482 | -0.660785 | -3.902882 | C  | 2.729788  | -2.933235 | -1.390694 |
| C                                               | -1.135523 | -1.971016 | -3.552890 | C  | 3.511260  | -2.315213 | -0.381403 |
| C                                               | -1.662457 | -2.697905 | -2.467145 | C  | 3.213993  | -2.596228 | 1.022821  |
| C                                               | -0.802088 | -3.512271 | -1.625389 | C  | 2.109026  | -3.449769 | 1.325513  |
| C                                               | -1.149072 | -3.694830 | -0.213060 | C  | 1.253325  | -3.205245 | 2.430133  |
| C                                               | -2.350107 | -3.099050 | 0.347591  | C  | 1.507886  | -2.145915 | 3.343727  |
| C                                               | -2.389604 | -2.680928 | 1.720121  | C  | 0.385417  | -1.532270 | 3.972716  |
| C                                               | -3.333261 | -1.612999 | 2.065648  | C  | 0.382332  | -0.124482 | 4.256295  |
| C                                               | -2.903721 | -0.608706 | 2.987865  | C  | 1.501675  | 0.689853  | 3.915296  |
| C                                               | -3.338177 | 0.672693  | 2.526181  | C  | 1.241778  | 2.019237  | 3.482923  |
| C                                               | -2.399380 | 1.795136  | 2.622174  | C  | 2.095467  | 2.676138  | 2.559744  |
| C                                               | -2.363058 | 2.712371  | 1.518680  | C  | 1.269918  | 3.582965  | 1.798988  |
| C                                               | -3.301955 | 2.474873  | 0.428041  | C  | 1.586270  | 3.899095  | 0.504211  |
| C                                               | -2.881999 | 2.743832  | -0.907265 | C  | 2.716196  | 3.255027  | -0.143835 |
| C                                               | -1.675938 | 3.435657  | -1.231052 | C  | 2.377703  | 3.104875  | -1.520761 |
| C                                               | -1.146916 | 3.188259  | -2.513216 | C  | 2.756382  | 1.949537  | -2.268511 |
| C                                               | -1.661710 | 2.113728  | -3.343756 | C  | 3.654677  | 1.078101  | -1.617789 |
| C                                               | -0.528385 | 1.511781  | -4.004520 | C  | 3.657966  | -0.351542 | -1.905948 |
| C                                               | -0.525360 | 0.154972  | -4.277841 | C  | 4.057380  | -1.046083 | -0.729979 |
| C                                               | 0.682753  | -0.594019 | -4.121054 | C  | 4.326189  | -0.046394 | 0.278439  |
| C                                               | 0.279617  | -1.942511 | -3.777703 | C  | 4.052154  | -0.312688 | 1.596577  |
| C                                               | 1.097241  | -2.751466 | -3.027573 | C  | 3.512410  | -1.599959 | 1.990418  |
| C                                               | 0.555801  | -3.612056 | -2.011164 | C  | 2.672007  | -1.366551 | 3.114168  |
| C                                               | 1.603331  | -3.783023 | -1.043740 | C  | 2.668899  | 0.065153  | 3.402717  |
| C                                               | 1.286799  | -3.994597 | 0.272125  | C  | 3.507268  | 0.719210  | 2.457666  |
| C                                               | -0.096727 | -3.988765 | 0.691167  | C  | 3.203856  | 2.011290  | 1.951185  |
| C                                               | -0.114924 | -3.545229 | 2.041405  | C  | 3.501099  | 2.297491  | 0.547984  |
| C                                               | -1.220239 | -2.852028 | 2.572633  | C  | 4.052205  | 1.264697  | -0.264292 |
| C                                               | -0.950495 | -1.921637 | 3.631117  | Th | -2.288686 | -0.024727 | 0.099418  |
| C                                               | -1.762545 | -0.764205 | 3.771917  |    |           |           |           |
| C                                               | -0.955559 | 0.360969  | 4.091183  |    |           |           |           |

| Th@C <sub>s</sub> (15)-C <sub>84</sub> Pyracylene (1) |           |           |           |    |           |           |           |
|-------------------------------------------------------|-----------|-----------|-----------|----|-----------|-----------|-----------|
| C                                                     | -3.518676 | 0.289265  | -2.366555 | C  | 0.994639  | -3.151172 | 2.264583  |
| C                                                     | -4.213205 | -0.189767 | -1.175849 | C  | 0.782085  | -1.022132 | 3.637165  |
| C                                                     | -1.186824 | 1.027662  | -3.892405 | C  | -0.607227 | -1.312503 | 3.754916  |
| C                                                     | -1.584098 | -0.295094 | -3.836805 | C  | -1.924343 | 2.025620  | -3.152146 |
| C                                                     | -2.759442 | -0.670294 | -3.100573 | C  | -3.057020 | 1.679320  | -2.380843 |
| C                                                     | 0.199162  | 1.350016  | -3.921086 | C  | -3.273818 | 2.465314  | -1.175550 |
| C                                                     | -0.605951 | -1.336877 | -3.746852 | C  | -2.202448 | 3.319752  | -0.716970 |
| C                                                     | 0.782647  | -1.046021 | -3.630802 | C  | -1.010310 | 3.620907  | -1.464110 |
| C                                                     | 1.199397  | 0.344125  | -3.739107 | C  | -0.946767 | 3.017992  | -2.735093 |
| C                                                     | 3.284370  | -0.213626 | -2.550840 | C  | 1.476428  | 3.009176  | -2.633749 |
| C                                                     | 2.451845  | 0.766543  | -3.128354 | C  | 0.320995  | 2.639406  | -3.290446 |
| C                                                     | 2.593588  | 2.086820  | -2.602640 | C  | 1.436546  | 3.758916  | 1.391405  |
| C                                                     | -2.540514 | -2.023134 | -2.654135 | C  | 0.199381  | 3.980904  | 0.715393  |
| C                                                     | -3.102882 | -2.470659 | -1.437445 | C  | 0.199801  | 3.975654  | -0.741120 |
| C                                                     | -3.912320 | -1.525649 | -0.707805 | C  | 1.436824  | 3.749922  | -1.415256 |
| C                                                     | -2.406477 | -3.457248 | -0.709373 | C  | -2.203887 | 3.325686  | 0.695811  |
| C                                                     | -1.219554 | -2.428975 | -3.051762 | C  | -0.947352 | 3.035861  | 2.714638  |
| C                                                     | -0.456701 | -3.324171 | -2.262900 | C  | -1.010740 | 3.631623  | 1.440406  |
| C                                                     | -1.120390 | -3.926532 | -1.155196 | C  | 3.341844  | 2.359687  | 1.408627  |
| C                                                     | 0.995272  | -4.222390 | 0.014030  | C  | 2.632361  | 3.389292  | 0.675806  |
| C                                                     | -0.383118 | -4.287167 | 0.014074  | C  | 2.632408  | 3.385022  | -0.697219 |
| C                                                     | 2.900483  | -1.610839 | -2.518618 | C  | 4.105979  | 0.080116  | 1.409960  |
| C                                                     | 1.612203  | -2.023716 | -2.934067 | C  | 4.036345  | 1.318024  | 0.728475  |
| C                                                     | 0.995245  | -3.165795 | -2.244045 | C  | 0.320042  | 2.660758  | 3.273111  |
| C                                                     | 1.695018  | -3.754306 | -1.155569 | C  | 3.283754  | -0.197392 | 2.552033  |
| C                                                     | -2.407581 | -3.453101 | 0.731167  | C  | 2.451019  | 0.786670  | 3.123117  |
| C                                                     | -3.103836 | -2.461684 | 1.451881  | C  | 2.593092  | 2.103567  | 2.589066  |
| C                                                     | -3.914554 | -1.521171 | 0.717208  | C  | 1.476004  | 3.026589  | 2.614399  |
| C                                                     | -2.540594 | -2.004599 | 2.664756  | C  | 2.965614  | -3.245316 | 0.730356  |
| C                                                     | -1.220322 | -2.408400 | 3.066753  | C  | 3.564182  | -2.201014 | 1.419338  |
| C                                                     | -0.457179 | -3.309436 | 2.284000  | C  | 2.900013  | -1.594322 | 2.529132  |
| C                                                     | -1.120618 | -3.918902 | 1.180531  | C  | 1.611487  | -2.004358 | 2.947119  |
| C                                                     | -2.759870 | -0.648751 | 3.100902  | C  | 1.198610  | 0.368207  | 3.736452  |
| C                                                     | -3.524402 | 0.306489  | 2.364393  | C  | 0.198030  | 1.375962  | 3.912158  |
| C                                                     | -4.220649 | -0.182470 | 1.177539  | C  | 4.270066  | -1.169853 | -0.687463 |
| C                                                     | -4.503852 | 0.632089  | -0.002811 | C  | 3.564884  | -2.210318 | -1.405358 |
| C                                                     | -4.009307 | 2.005031  | -0.006982 | C  | 2.965862  | -3.250287 | -0.709432 |
| C                                                     | -1.584682 | -0.269741 | 3.835882  | C  | 4.269539  | -1.165082 | 0.694569  |
| C                                                     | -1.187515 | 1.053154  | 3.883610  | C  | 3.341639  | 2.350288  | -1.423341 |
| C                                                     | -1.925702 | 2.045945  | 3.136601  | C  | 4.036387  | 1.313287  | -0.736643 |
| C                                                     | -3.062158 | 1.697256  | 2.370399  | C  | 4.106077  | 0.071026  | -1.410582 |
| C                                                     | -3.278712 | 2.477463  | 1.160415  | Th | -2.100148 | 0.514817  | 0.015624  |
| C                                                     | 1.694588  | -3.746956 | 1.180091  |    |           |           |           |



| Th@C <sub>s</sub> (15)-C <sub>84</sub> Pyracylene (2) |           |           |           |    |           |           |           |
|-------------------------------------------------------|-----------|-----------|-----------|----|-----------|-----------|-----------|
| C                                                     | -4.167481 | -1.432444 | -0.174011 | C  | -1.249551 | 1.593805  | 3.451871  |
| C                                                     | -4.255928 | -0.487285 | -1.257537 | C  | -0.111628 | 2.420639  | 3.174851  |
| C                                                     | -3.475167 | -0.992838 | -2.362906 | C  | -0.084989 | 3.444343  | 2.175851  |
| C                                                     | -2.907160 | -2.239364 | -1.952861 | C  | -1.190904 | 3.483769  | 1.210703  |
| C                                                     | -3.277498 | -2.480865 | -0.566445 | C  | -0.853036 | 3.852567  | -0.140771 |
| C                                                     | -4.169989 | -0.990423 | 1.146411  | C  | 0.557191  | 4.116791  | -0.440536 |
| C                                                     | -4.164882 | 0.425332  | 1.422198  | C  | 1.066886  | 3.644623  | -1.696874 |
| C                                                     | -4.161828 | 1.334020  | 0.382448  | C  | 0.255694  | 3.230965  | -2.751260 |
| C                                                     | -4.245903 | 0.874692  | -0.988116 | C  | 0.665871  | 2.140710  | -3.574957 |
| C                                                     | -3.491096 | 1.778219  | -1.813064 | C  | 1.854557  | 1.395786  | -3.307917 |
| C                                                     | -2.789407 | 1.322097  | -2.952734 | C  | 1.865994  | -0.024757 | -3.613684 |
| C                                                     | -2.783375 | -0.116966 | -3.241765 | C  | 2.764652  | -0.908428 | -2.876032 |
| C                                                     | -1.659891 | -0.676539 | -3.905775 | C  | 2.384681  | -2.253901 | -2.628832 |
| C                                                     | -1.152721 | -1.960041 | -3.567575 | C  | 2.710792  | -2.924708 | -1.404832 |
| C                                                     | -1.694906 | -2.716022 | -2.486044 | C  | 3.483972  | -2.304998 | -0.393135 |
| C                                                     | -0.821150 | -3.506334 | -1.629547 | C  | 3.179716  | -2.588565 | 1.018705  |
| C                                                     | -1.157522 | -3.675970 | -0.220405 | C  | 2.087992  | -3.445110 | 1.313567  |
| C                                                     | -2.373602 | -3.078914 | 0.336265  | C  | 1.219723  | -3.198610 | 2.437564  |
| C                                                     | -2.417289 | -2.660132 | 1.744107  | C  | 1.486988  | -2.150897 | 3.355677  |
| C                                                     | -3.326719 | -1.631753 | 2.105544  | C  | 0.366712  | -1.537202 | 3.977338  |
| C                                                     | -2.951880 | -0.622369 | 3.080798  | C  | 0.375702  | -0.124429 | 4.265843  |
| C                                                     | -3.333660 | 0.665594  | 2.577235  | C  | 1.487646  | 0.659546  | 3.913152  |
| C                                                     | -2.432518 | 1.758927  | 2.630322  | C  | 1.223273  | 1.981657  | 3.421560  |
| C                                                     | -2.382560 | 2.692446  | 1.491526  | C  | 2.117309  | 2.730593  | 2.570739  |
| C                                                     | -3.283779 | 2.472587  | 0.420207  | C  | 1.316490  | 3.729431  | 1.881455  |
| C                                                     | -2.918152 | 2.774029  | -0.936188 | C  | 1.660569  | 4.053099  | 0.515420  |
| C                                                     | -1.705647 | 3.428081  | -1.243398 | C  | 2.750921  | 3.320237  | -0.119319 |
| C                                                     | -1.158338 | 3.153963  | -2.539857 | C  | 2.349320  | 3.062582  | -1.494660 |
| C                                                     | -1.674336 | 2.107305  | -3.365941 | C  | 2.740236  | 1.906079  | -2.266644 |
| C                                                     | -0.544202 | 1.504507  | -4.023289 | C  | 3.669118  | 1.055659  | -1.650550 |
| C                                                     | -0.524613 | 0.149438  | -4.291890 | C  | 3.669570  | -0.346908 | -1.932329 |
| C                                                     | 0.682557  | -0.598167 | -4.164791 | C  | 4.049912  | -1.043522 | -0.739013 |
| C                                                     | 0.276528  | -1.931655 | -3.797086 | C  | 4.308282  | -0.054191 | 0.270042  |
| C                                                     | 1.087424  | -2.735310 | -3.045323 | C  | 4.039259  | -0.334092 | 1.606252  |
| C                                                     | 0.543986  | -3.596210 | -2.014951 | C  | 3.510661  | -1.601261 | 1.998270  |
| C                                                     | 1.582975  | -3.767240 | -1.061992 | C  | 2.662571  | -1.366166 | 3.136993  |
| C                                                     | 1.267869  | -3.980089 | 0.268239  | C  | 2.664785  | 0.033185  | 3.430060  |
| C                                                     | -0.106696 | -3.958596 | 0.681200  | C  | 3.492354  | 0.701301  | 2.449840  |
| C                                                     | -0.127631 | -3.525033 | 2.054685  | C  | 3.256913  | 2.019175  | 1.963077  |
| C                                                     | -1.238946 | -2.846924 | 2.591591  | C  | 3.563023  | 2.311203  | 0.567324  |
| C                                                     | -0.972155 | -1.929729 | 3.653508  | C  | 4.046437  | 1.247520  | -0.255839 |
| C                                                     | -1.799151 | -0.774542 | 3.816569  | Th | 0.934915  | 1.755752  | 0.547054  |
| C                                                     | -0.971141 | 0.364242  | 4.083617  |    |           |           |           |

|                                            |           |           |           |    |           |           |           |
|--------------------------------------------|-----------|-----------|-----------|----|-----------|-----------|-----------|
| Th@C <sub>s</sub> (15)-C <sub>84</sub> THJ |           |           |           | C  | -1.272620 | 1.620370  | 3.502145  |
| C                                          | -4.170147 | -1.397782 | -0.158511 | C  | -0.162944 | 2.454526  | 3.270366  |
| C                                          | -4.256949 | -0.444439 | -1.248311 | C  | -0.136616 | 3.393010  | 2.169477  |
| C                                          | -3.496113 | -0.959461 | -2.360107 | C  | -1.180825 | 3.462480  | 1.222359  |
| C                                          | -2.922165 | -2.207925 | -1.937230 | C  | -0.836822 | 3.842868  | -0.148376 |
| C                                          | -3.295133 | -2.456394 | -0.564173 | C  | 0.525364  | 4.077318  | -0.466345 |
| C                                          | -4.181672 | -0.961395 | 1.154920  | C  | 1.079324  | 3.692675  | -1.751179 |
| C                                          | -4.184953 | 0.453832  | 1.443679  | C  | 0.264676  | 3.230697  | -2.755319 |
| C                                          | -4.180877 | 1.369841  | 0.394833  | C  | 0.674750  | 2.146137  | -3.600282 |
| C                                          | -4.263466 | 0.911252  | -0.972116 | C  | 1.858813  | 1.411499  | -3.324019 |
| C                                          | -3.487171 | 1.807642  | -1.800992 | C  | 1.867034  | -0.019509 | -3.618850 |
| C                                          | -2.797134 | 1.341373  | -2.950060 | C  | 2.751397  | -0.899460 | -2.876751 |
| C                                          | -2.798691 | -0.097772 | -3.240027 | C  | 2.385478  | -2.246926 | -2.625553 |
| C                                          | -1.679227 | -0.658875 | -3.914932 | C  | 2.732061  | -2.924750 | -1.392120 |
| C                                          | -1.157610 | -1.933124 | -3.556253 | C  | 3.521709  | -2.336484 | -0.352529 |
| C                                          | -1.706641 | -2.685924 | -2.474638 | C  | 3.357782  | -2.713519 | 1.076280  |
| C                                          | -0.830278 | -3.463667 | -1.614110 | C  | 2.161703  | -3.525150 | 1.387236  |
| C                                          | -1.168357 | -3.610341 | -0.223042 | C  | 1.261344  | -3.245094 | 2.508687  |
| C                                          | -2.381190 | -3.050452 | 0.337615  | C  | 1.498813  | -2.195251 | 3.474320  |
| C                                          | -2.428696 | -2.639808 | 1.750434  | C  | 0.358219  | -1.542212 | 3.990983  |
| C                                          | -3.341589 | -1.615018 | 2.122879  | C  | 0.326399  | -0.115595 | 4.281646  |
| C                                          | -2.976800 | -0.625989 | 3.098950  | C  | 1.434107  | 0.690183  | 3.940333  |
| C                                          | -3.350200 | 0.679628  | 2.581027  | C  | 1.180735  | 2.009584  | 3.509218  |
| C                                          | -2.446377 | 1.772105  | 2.641694  | C  | 2.046464  | 2.669631  | 2.553284  |
| C                                          | -2.397176 | 2.698098  | 1.504075  | C  | 1.234849  | 3.577941  | 1.801221  |
| C                                          | -3.293872 | 2.487157  | 0.433717  | C  | 1.563122  | 3.880825  | 0.487478  |
| C                                          | -2.920817 | 2.796957  | -0.939050 | C  | 2.691481  | 3.249691  | -0.149157 |
| C                                          | -1.708535 | 3.441455  | -1.245301 | C  | 2.369187  | 3.099497  | -1.555904 |
| C                                          | -1.160898 | 3.158856  | -2.531807 | C  | 2.746743  | 1.947601  | -2.289757 |
| C                                          | -1.672758 | 2.110639  | -3.347117 | C  | 3.643554  | 1.055137  | -1.630510 |
| C                                          | -0.540247 | 1.502875  | -4.023183 | C  | 3.645283  | -0.337785 | -1.913986 |
| C                                          | -0.543521 | 0.158083  | -4.294716 | C  | 4.027146  | -1.036891 | -0.714302 |
| C                                          | 0.673824  | -0.600096 | -4.154133 | C  | 4.297052  | -0.049948 | 0.284485  |
| C                                          | 0.272268  | -1.917327 | -3.796275 | C  | 4.017110  | -0.353363 | 1.638505  |
| C                                          | 1.093794  | -2.724810 | -3.029247 | C  | 3.624765  | -1.667060 | 2.095958  |
| C                                          | 0.550900  | -3.572845 | -2.004066 | C  | 2.700721  | -1.415084 | 3.236459  |
| C                                          | 1.589047  | -3.725265 | -1.049158 | C  | 2.587814  | 0.015372  | 3.402715  |
| C                                          | 1.285506  | -3.912723 | 0.300803  | C  | 3.399300  | 0.663980  | 2.427551  |
| C                                          | -0.083099 | -3.838517 | 0.691621  | C  | 3.113309  | 1.989775  | 1.934329  |
| C                                          | -0.105180 | -3.438775 | 2.047012  | C  | 3.446347  | 2.284335  | 0.540955  |
| C                                          | -1.260492 | -2.807845 | 2.600494  | C  | 4.017583  | 1.237101  | -0.252221 |
| C                                          | -1.008672 | -1.929430 | 3.675916  | Th | 1.500791  | -1.165132 | 1.044660  |
| C                                          | -1.831822 | -0.778276 | 3.848682  |    |           |           |           |
| C                                          | -1.004600 | 0.361694  | 4.132666  |    |           |           |           |

| Th@C <sub>s</sub> (10)-C <sub>84</sub> Sumanene |           |           |           |    |           |           |           |
|-------------------------------------------------|-----------|-----------|-----------|----|-----------|-----------|-----------|
|                                                 |           |           |           | C  | -0.200462 | 3.153173  | 2.690992  |
| C                                               | -4.421840 | -1.389062 | 0.006833  | C  | -0.197033 | 3.879652  | 1.460375  |
| C                                               | -4.418624 | -0.654234 | -1.237719 | C  | -1.290805 | 3.811543  | 0.563944  |
| C                                               | -3.508274 | -1.324494 | -2.137096 | C  | -0.991620 | 3.943903  | -0.821044 |
| C                                               | -3.058667 | -2.522089 | -1.497542 | C  | 0.354679  | 3.927192  | -1.307390 |
| C                                               | -3.513823 | -2.502679 | -0.141946 | C  | 0.380327  | 3.148887  | -2.517621 |
| C                                               | -4.389630 | -0.678051 | 1.281576  | C  | 1.502445  | 2.372264  | -2.871010 |
| C                                               | -4.354180 | 0.790522  | 1.288558  | C  | 1.271542  | 1.103928  | -3.560803 |
| C                                               | -4.350815 | 1.520649  | 0.051887  | C  | 2.304883  | 0.137515  | -3.484513 |
| C                                               | -4.382754 | 0.805521  | -1.230497 | C  | 2.027200  | -1.261518 | -3.513894 |
| C                                               | -3.413719 | 1.449028  | -2.093715 | C  | 2.857013  | -1.943432 | -2.532617 |
| C                                               | -2.499449 | 0.781809  | -3.007404 | C  | 2.335028  | -3.035383 | -1.785742 |
| C                                               | -2.617904 | -0.666009 | -3.081213 | C  | 2.851240  | -3.163474 | -0.466658 |
| C                                               | -1.527998 | -1.401793 | -3.555830 | C  | 2.015852  | -3.691523 | 0.600904  |
| C                                               | -1.174050 | -2.709966 | -3.011041 | C  | 2.290285  | -2.990814 | 1.812882  |
| C                                               | -1.889971 | -3.231180 | -1.913063 | C  | 1.254200  | -2.587915 | 2.691377  |
| C                                               | -1.179873 | -3.942866 | -0.923688 | C  | 1.484827  | -1.371996 | 3.469754  |
| C                                               | -1.539234 | -3.787240 | 0.483398  | C  | 0.362285  | -0.684772 | 3.974470  |
| C                                               | -2.628887 | -3.013620 | 0.894098  | C  | 0.339542  | 0.751053  | 4.071722  |
| C                                               | -2.513772 | -2.250180 | 2.126798  | C  | 1.444140  | 1.530496  | 3.628166  |
| C                                               | -3.425784 | -1.125541 | 2.265777  | C  | 1.157066  | 2.766235  | 2.977432  |
| C                                               | -2.977606 | 0.031176  | 2.975736  | C  | 1.996989  | 3.261679  | 1.931419  |
| C                                               | -3.414723 | 1.212821  | 2.301850  | C  | 1.162783  | 3.940684  | 0.988982  |
| C                                               | -2.494875 | 2.346135  | 2.203891  | C  | 1.455631  | 3.912738  | -0.406299 |
| C                                               | -2.491656 | 3.069172  | 0.979551  | C  | 2.632631  | 3.254941  | -0.832893 |
| C                                               | -3.408452 | 2.610012  | -0.063874 | C  | 2.670486  | 2.543635  | -2.069816 |
| C                                               | -2.965790 | 2.628645  | -1.422240 | C  | 3.607271  | 1.466406  | -1.898855 |
| C                                               | -1.790160 | 3.262531  | -1.797778 | C  | 3.433221  | 0.298831  | -2.591855 |
| C                                               | -0.959735 | 2.708877  | -2.801944 | C  | 3.729724  | -0.974938 | -1.960791 |
| C                                               | -1.240673 | 1.421865  | -3.345630 | C  | 4.133532  | -1.031275 | -0.597212 |
| C                                               | -0.098173 | 0.631729  | -3.790742 | C  | 3.724214  | -2.197415 | 0.108787  |
| C                                               | -0.307966 | -0.756324 | -3.954063 | C  | 3.422004  | -2.133993 | 1.527783  |
| C                                               | 0.753180  | -1.707184 | -3.769369 | C  | 3.595605  | -0.963337 | 2.215646  |
| C                                               | 0.233819  | -2.879894 | -3.106308 | C  | 2.655576  | -0.590456 | 3.237522  |
| C                                               | 0.982769  | -3.525765 | -2.079264 | C  | 2.620959  | 0.836346  | 3.263023  |
| C                                               | 0.228121  | -4.111477 | -1.020863 | C  | 3.488677  | 1.340257  | 2.205357  |
| C                                               | 0.741774  | -4.127188 | 0.328552  | C  | 3.148666  | 2.528211  | 1.501530  |
| C                                               | -0.322501 | -3.827165 | 1.245879  | C  | 3.494725  | 2.570090  | 0.122859  |
| C                                               | -0.115240 | -3.013989 | 2.383051  | C  | 4.082778  | 1.451735  | -0.529533 |
| C                                               | -1.257819 | -2.240015 | 2.855393  | C  | 4.317791  | 0.219980  | 0.141893  |
| C                                               | -0.977800 | -1.142977 | 3.720801  | C  | 4.076999  | 0.227546  | 1.543740  |
| C                                               | -1.805375 | 0.005657  | 3.717242  | Th | -2.368788 | 0.003127  | -0.004931 |
| C                                               | -1.004654 | 1.188179  | 3.845727  |    |           |           |           |
| C                                               | -1.297656 | 2.337744  | 3.059659  |    |           |           |           |

| Th@C <sub>s</sub> (10)-C <sub>84</sub> THJ (1) |           |           |           |    |           |           |           |
|------------------------------------------------|-----------|-----------|-----------|----|-----------|-----------|-----------|
|                                                |           |           |           | C  | -0.239723 | 3.136423  | 2.688065  |
| C                                              | -4.308753 | -1.342409 | 0.041227  | C  | -0.236186 | 3.867762  | 1.447274  |
| C                                              | -4.305398 | -0.601843 | -1.213161 | C  | -1.341215 | 3.811262  | 0.548534  |
| C                                              | -3.527861 | -1.331705 | -2.161272 | C  | -1.029467 | 3.951185  | -0.829387 |
| C                                              | -3.114018 | -2.553175 | -1.516331 | C  | 0.327685  | 3.927290  | -1.304838 |
| C                                              | -3.533477 | -2.526926 | -0.136993 | C  | 0.358614  | 3.140490  | -2.522836 |
| C                                              | -4.279706 | -0.664355 | 1.245412  | C  | 1.459857  | 2.334736  | -2.836202 |
| C                                              | -4.261264 | 0.781112  | 1.256849  | C  | 1.249657  | 1.083894  | -3.539237 |
| C                                              | -4.257752 | 1.487939  | 0.059534  | C  | 2.304902  | 0.117132  | -3.467933 |
| C                                              | -4.272538 | 0.779959  | -1.200629 | C  | 2.030849  | -1.277125 | -3.507316 |
| C                                              | -3.403166 | 1.479356  | -2.122705 | C  | 2.855270  | -1.962198 | -2.551331 |
| C                                              | -2.527423 | 0.792347  | -3.004836 | C  | 2.322800  | -3.031702 | -1.783686 |
| C                                              | -2.645471 | -0.663986 | -3.061380 | C  | 2.849493  | -3.188802 | -0.474208 |
| C                                              | -1.545331 | -1.407294 | -3.545604 | C  | 2.019360  | -3.692983 | 0.583834  |
| C                                              | -1.210685 | -2.695153 | -3.009972 | C  | 2.290080  | -2.985722 | 1.786766  |
| C                                              | -1.937158 | -3.229248 | -1.912267 | C  | 1.232108  | -2.578398 | 2.663144  |
| C                                              | -1.216596 | -3.934335 | -0.911559 | C  | 1.441892  | -1.359134 | 3.419494  |
| C                                              | -1.556565 | -3.780507 | 0.473400  | C  | 0.340263  | -0.693124 | 3.969680  |
| C                                              | -2.656380 | -2.994702 | 0.885933  | C  | 0.312405  | 0.753547  | 4.071273  |
| C                                              | -2.541958 | -2.242371 | 2.134511  | C  | 1.392241  | 1.541166  | 3.638388  |
| C                                              | -3.415882 | -1.136140 | 2.306717  | C  | 1.097451  | 2.764202  | 2.982869  |
| C                                              | -3.015855 | 0.023001  | 3.048096  | C  | 1.969767  | 3.242576  | 1.920762  |
| C                                              | -3.418581 | 1.217599  | 2.334803  | C  | 1.103110  | 3.941802  | 0.984395  |
| C                                              | -2.543720 | 2.325484  | 2.219516  | C  | 1.403870  | 3.924909  | -0.401895 |
| C                                              | -2.540216 | 3.072510  | 0.954177  | C  | 2.604912  | 3.232197  | -0.774190 |
| C                                              | -3.411596 | 2.640422  | -0.075364 | C  | 2.616084  | 2.477794  | -1.980320 |
| C                                              | -3.002946 | 2.687401  | -1.464134 | C  | 3.586943  | 1.448128  | -1.836268 |
| C                                              | -1.828633 | 3.301354  | -1.824932 | C  | 3.430625  | 0.278244  | -2.581903 |
| C                                              | -0.977272 | 2.709655  | -2.816288 | C  | 3.727267  | -0.969995 | -1.962184 |
| C                                              | -1.249262 | 1.428521  | -3.354768 | C  | 4.129311  | -1.009988 | -0.584708 |
| C                                              | -0.110718 | 0.626770  | -3.783544 | C  | 3.721920  | -2.196280 | 0.113695  |
| C                                              | -0.320040 | -0.770793 | -3.951169 | C  | 3.419172  | -2.134972 | 1.504732  |
| C                                              | 0.734097  | -1.715310 | -3.764628 | C  | 3.574426  | -0.916741 | 2.168580  |
| C                                              | 0.214095  | -2.875940 | -3.108223 | C  | 2.600503  | -0.543035 | 3.135394  |
| C                                              | 0.952641  | -3.515742 | -2.073531 | C  | 2.592968  | 0.877395  | 3.214678  |
| C                                              | 0.208255  | -4.110953 | -1.016704 | C  | 3.567505  | 1.428241  | 2.280405  |
| C                                              | 0.722564  | -4.126637 | 0.318935  | C  | 3.233590  | 2.658380  | 1.578791  |
| C                                              | -0.334703 | -3.831334 | 1.231637  | C  | 3.573830  | 2.677814  | 0.163927  |
| C                                              | -0.128026 | -3.009776 | 2.375073  | C  | 4.178501  | 1.497873  | -0.521587 |
| C                                              | -1.266726 | -2.244456 | 2.865518  | C  | 4.429837  | 0.238515  | 0.152913  |
| C                                              | -0.995781 | -1.154940 | 3.728531  | C  | 4.171689  | 0.256809  | 1.580242  |
| C                                              | -1.844521 | 0.000774  | 3.764731  | Th | 1.985530  | 0.815930  | 0.485730  |
| C                                              | -1.042894 | 1.184511  | 3.856767  |    |           |           |           |
| C                                              | -1.348329 | 2.324365  | 3.067611  |    |           |           |           |

| Th@C <sub>s</sub> (10)-C <sub>84</sub> THJ (2) |           |           |           |    |           |           |           |
|------------------------------------------------|-----------|-----------|-----------|----|-----------|-----------|-----------|
| C                                              | -4.290470 | -1.340874 | 0.035092  | C  | -0.239122 | 3.199604  | 2.764433  |
| C                                              | -4.306368 | -0.609249 | -1.215733 | C  | -0.225005 | 3.781234  | 1.450886  |
| C                                              | -3.520806 | -1.328136 | -2.152524 | C  | -1.333107 | 3.771783  | 0.535958  |
| C                                              | -3.098914 | -2.562976 | -1.511668 | C  | -1.012967 | 3.929675  | -0.828896 |
| C                                              | -3.508602 | -2.534068 | -0.143885 | C  | 0.351767  | 3.897404  | -1.316164 |
| C                                              | -4.254083 | -0.661291 | 1.238496  | C  | 0.379082  | 3.141252  | -2.528929 |
| C                                              | -4.261013 | 0.792128  | 1.254704  | C  | 1.503266  | 2.357425  | -2.877968 |
| C                                              | -4.284543 | 1.494048  | 0.042520  | C  | 1.268832  | 1.099412  | -3.565567 |
| C                                              | -4.282313 | 0.788378  | -1.198193 | C  | 2.310988  | 0.124258  | -3.490540 |
| C                                              | -3.404907 | 1.483393  | -2.119533 | C  | 2.025674  | -1.268582 | -3.518512 |
| C                                              | -2.523216 | 0.799186  | -2.995684 | C  | 2.859267  | -1.962987 | -2.544408 |
| C                                              | -2.637147 | -0.658381 | -3.051974 | C  | 2.342362  | -3.047323 | -1.799696 |
| C                                              | -1.534490 | -1.390959 | -3.539176 | C  | 2.869568  | -3.190705 | -0.479550 |
| C                                              | -1.184232 | -2.685290 | -2.996661 | C  | 2.042273  | -3.714264 | 0.581956  |
| C                                              | -1.915606 | -3.229848 | -1.906436 | C  | 2.324128  | -3.010300 | 1.794077  |
| C                                              | -1.182604 | -3.937162 | -0.917608 | C  | 1.271158  | -2.586766 | 2.662816  |
| C                                              | -1.522509 | -3.783846 | 0.476316  | C  | 1.505533  | -1.377250 | 3.429146  |
| C                                              | -2.628038 | -3.003137 | 0.880564  | C  | 0.378239  | -0.653828 | 3.948124  |
| C                                              | -2.501452 | -2.236638 | 2.112992  | C  | 0.343559  | 0.798414  | 4.211393  |
| C                                              | -3.393635 | -1.128373 | 2.299367  | C  | 1.495224  | 1.574886  | 3.775571  |
| C                                              | -2.993581 | 0.033473  | 3.009040  | C  | 1.148135  | 2.808850  | 3.071259  |
| C                                              | -3.448872 | 1.234364  | 2.334671  | C  | 1.949199  | 3.175704  | 1.922825  |
| C                                              | -2.531379 | 2.333536  | 2.232009  | C  | 1.116786  | 3.815512  | 0.968412  |
| C                                              | -2.542207 | 3.066508  | 0.943622  | C  | 1.441025  | 3.861763  | -0.425384 |
| C                                              | -3.417493 | 2.642756  | -0.084666 | C  | 2.635598  | 3.234702  | -0.841160 |
| C                                              | -3.002147 | 2.694713  | -1.465589 | C  | 2.680037  | 2.525286  | -2.076580 |
| C                                              | -1.819348 | 3.298035  | -1.825950 | C  | 3.620951  | 1.454108  | -1.907375 |
| C                                              | -0.969002 | 2.714157  | -2.819787 | C  | 3.431071  | 0.279081  | -2.597820 |
| C                                              | -1.244090 | 1.438018  | -3.352245 | C  | 3.739530  | -0.992111 | -1.971792 |
| C                                              | -0.100445 | 0.640423  | -3.787916 | C  | 4.139269  | -1.050619 | -0.609297 |
| C                                              | -0.319466 | -0.751151 | -3.938734 | C  | 3.742544  | -2.219321 | 0.100286  |
| C                                              | 0.744675  | -1.705815 | -3.759591 | C  | 3.449895  | -2.163910 | 1.519425  |
| C                                              | 0.227412  | -2.876339 | -3.106909 | C  | 3.616874  | -0.981648 | 2.217223  |
| C                                              | 0.978641  | -3.525506 | -2.085679 | C  | 2.684232  | -0.616808 | 3.229625  |
| C                                              | 0.233445  | -4.116845 | -1.027926 | C  | 2.596410  | 0.840814  | 3.254404  |
| C                                              | 0.755365  | -4.132050 | 0.310775  | C  | 3.483281  | 1.320715  | 2.195176  |
| C                                              | -0.308927 | -3.851061 | 1.235534  | C  | 3.144810  | 2.494770  | 1.483309  |
| C                                              | -0.096908 | -3.012631 | 2.352851  | C  | 3.494064  | 2.559719  | 0.115861  |
| C                                              | -1.229121 | -2.226254 | 2.803075  | C  | 4.087937  | 1.431916  | -0.542308 |
| C                                              | -0.932700 | -1.091123 | 3.625567  | C  | 4.318281  | 0.205398  | 0.132932  |
| C                                              | -1.793295 | 0.044125  | 3.705004  | C  | 4.081651  | 0.207924  | 1.542544  |
| C                                              | -1.035604 | 1.241354  | 3.968633  | Th | 0.124029  | 0.921008  | 1.792898  |
| C                                              | -1.397893 | 2.419605  | 3.158698  |    |           |           |           |
